# 1 **Structural insights into human excitatory amino acid transporter EAAT2**

2

## 3 **Authors**

4 Takafumi Kato<sup>1, \*</sup>, Tsukasa Kusakizako<sup>1</sup>, Chunhuan Jin<sup>2</sup>, LiLi Quan<sup>2, \*\*</sup>, Ryuichi Ohgaki<sup>2, 3</sup>,

5 Suguru Okuda<sup>2, \*\*\*</sup>, Kan Kobayashi<sup>1, \*\*\*\*</sup>, Keitaro Yamashita<sup>1, \*\*\*\*\*</sup>, Tomohiro Nishizawa<sup>1, \*\*\*\*\*</sup>,

6 Yoshikatsu Kanai<sup>2, 3, †</sup> and Osamu Nureki<sup>1, †</sup>

## 7 **Affiliation**

8 <sup>1</sup>Department of Biological Science, Graduate School of Science, The University of Tokyo, Tokyo, Japan.

9 <sup>2</sup>Department of Bio-system Pharmacology, Graduate School of Medicine, Osaka University, Osaka, Japan

10 <sup>3</sup> Integrated Frontier Research for Medical Science Division, Institute for Open and Transdisciplinary Research  
11 Initiative (OTRI), Osaka University, Osaka, Japan.

12 \*Present address: Department of Biochemistry, The University of Oxford, Oxford, UK

13 \*\*Present address: Department of Molecular Pharmacology, National Institute of Neuroscience, National Center of  
14 Neurology and Psychiatry, Tokyo, Japan.

15 \*\*\*Present address: Department of Applied Biological Chemistry, Graduate School of Agricultural and Life Sciences,  
16 The University of Tokyo, Tokyo, Japan

17 \*\*\*\*Present address: Peptidream Inc., Kawasaki, Japan

18 \*\*\*\*\*Present address: Structural Studies Division, MRC Laboratory of Molecular Biology, Cambridge, UK

19 \*\*\*\*\*Present address: Graduate School of Medical Life Science, Yokohama City University, Yokohama, Japan.

20 † Corresponding authors

21 †Correspondence to: [nureki@bs.s.u-tokyo.ac.jp](mailto:nureki@bs.s.u-tokyo.ac.jp) (O.N.)

22 [ykanai@pharma1.med.osaka-u.ac.jp](mailto:ykanai@pharma1.med.osaka-u.ac.jp) (Y.K.)

23

24           **Abstract**

25    Glutamate is a pivotal excitatory neurotransmitter in mammalian brains, but excessive  
26    glutamate causes numerous neural disorders. Almost all extracellular glutamate is retrieved by  
27    the glial transporter, Excitatory Amino Acid Transporter 2 (EAAT2), belonging to the SLC1A  
28    family. However, in some cancers, EAAT2 expression is enhanced and causes resistance to  
29    therapies by metabolic disturbance. Despite its crucial roles, the detailed structural information  
30    about EAAT2 has not been available. Here, we report cryo-EM structures of human EAAT2 in  
31    substrate-free and selective inhibitor WAY213613-bound states. EAAT2 forms a trimer, with  
32    each protomer consisting of transport and scaffold domains. Along with a glutamate-binding  
33    site, the transport domain possesses a cavity, that could be disrupted during the transport cycle.  
34    WAY213613 occupies both the glutamate-binding site and cavity of EAAT2 to interfere with its  
35    alternating access, where the sensitivity is defined by the inner environment of the cavity. This  
36    is the first characterization of molecular features of EAAT2 and the selective inhibition  
37    mechanism, underlying structure-based drug design for EAAT2.

38

39           **Main text**

40           **Introduction**

41           Amino acids are essential biomolecules for protein biosynthesis, metabolism and signal  
42 transduction, and the control of cellular amino -acid concentrations is quite important. Therefore,  
43 human cells have eleven discrete SoLute Carrier (SLC) families that transport various kinds of  
44 amino acids across the membrane<sup>1,2</sup>. The SLC1A family functions as a sodium-dependent  
45 symporter for the uptake of extracellular amino acids (Supplemental Fig. 1), and its members are  
46 categorized as Excitatory Amino Acid Transporters (EAATs; EAAT1–5 function as aspartate and  
47 glutamate transporters) and Alanine Serine Cysteine Transporters (ASCTs; ASCT1 and ACST2  
48 function as neutral amino-acid transporters)<sup>3</sup>.

49           Higher functions of the mammalian central nervous system (CNS) are linked to complex  
50 neural activities, such as learning and memory<sup>4</sup>. In the CNS, glutamate, a principal excitatory  
51 neurotransmitter, stimulates ionotropic receptors to elicit the postsynaptic action potential via  
52 various ion fluxes, including calcium ions<sup>5,6</sup>, although excessive glutamate at synaptic clefts is  
53 associated with greater calcium influx. The intracellular accumulation of calcium ions is related  
54 to mitochondrial dysfunction and oxidative stress and induces neuronal cell death, known as  
55 excitotoxicity<sup>7</sup>. To protect neuronal cells from excitotoxicity, the released glutamate is rapidly  
56 retrieved by transporters localized around the synaptic cleft. Especially, EAAT2 (also known as  
57 SLC1A2 or GLT-1) is highly expressed at the plasma membrane of glial cells and removes almost  
58 all (more than 90%) extracellular glutamate<sup>8–10</sup>. Therefore, EAAT2 plays a crucial role in the  
59 extracellular glutamate homeostasis. In accordance with its essential role, a deficiency in the  
60 EAAT2 transport activity is associated with serious diseases, including psychiatric and  
61 neurological disorders<sup>11–17</sup>.

62 Structural research on the SLC1A family has revealed the architectures and transport  
63 mechanisms of the archaeal homologues (Glt<sub>ph</sub> and Glt<sub>tk</sub>)<sup>18-25</sup> and four eukaryotic transporters  
64 (thermostabilized EAAT1, EAAT3, ASCT1 and ASCT2)<sup>26-31</sup>. SLC1A transporters are assembled  
65 into a trimer, with each protomer consisting of scaffold and transport domains to adopt a unique  
66 alternating access model, termed the “elevator-type mechanism”<sup>20,32</sup>. This model is operated by  
67 the rigid elevator-like movement of the transport domain to translocate substrates across the  
68 membrane. However, despite its pivotal role in the CNS, structural information about EAAT2 has  
69 not been reported. This information is particularly needed for pharmacological studies. Recent  
70 reports demonstrated that spider venom and a novel chemical compound function as “direct  
71 activators” to increase the transport activity of EAAT2 and provide neuroprotection against  
72 excitotoxicity<sup>33-35</sup>. In addition to neurological diseases, some kinds of tumors are related to the  
73 enhance expression of EAAT2, which is associated with resistance to a chemotherapeutic drug  
74 and endocrine therapies<sup>36-38</sup>. Since these resistances are clinical problems for patients, selective  
75 inhibitors of EAAT2 might be effective drugs for cancer therapies. Furthermore, highly selective  
76 inhibitors that can discriminate EAAT2 from other EAAT transporters will be useful for basic  
77 research to elucidate the physiological importance of EAAT2. Therefore, the structures of EAAT2  
78 will provide molecular insights to facilitate the structural-based drug design of both activators and  
79 inhibitors.

80 In this work, we performed cryo-EM single particle analyses to determine the structures of  
81 human EAAT2. Our structures, together with transport assays and comparisons with other EAAT  
82 structures, provide insights into the molecular features of EAAT2 and the inhibitory mechanism  
83 of the highly selective inhibitor WAY213613.

84

85           **Structural determination and overall structure**

86           We expressed full-length wild-type human EAAT2 (HsEAAT2) with a C-terminally-fused  
87 GFP tag (Supplemental Fig. 2) in mammalian Human Embryonic Kidney cells 293 (HEK293),  
88 and the recombinant proteins were purified with a GFP antibody<sup>39</sup>. For structural determination,  
89 purified HsEAAT2 proteins in glycol diosgenin (GDN) micelles were vitrified on grids, and 3,351  
90 micrographs were recorded by a K3 camera. With the C3 symmetry imposed, we finally obtained  
91 the three-dimensional reconstruction map at the global resolution of 3.6 Å, based on the Fourier  
92 Shell Correlation (FSC)=0.143 criterion (Supplemental Fig. 3). The densities of all  
93 transmembrane (TM) helices and  $\beta$ -strands were clearly observed (Supplemental Fig. 4), whereas  
94 the N- and C- termini, Ala110–Ser113, Lys148–Val162 and Lys194–Val229 were not detectable,  
95 suggesting that these regions are flexible.

96           HsEAAT2 forms a homotrimer (Fig. 1a, b), with each protomer consisting of eight TMs  
97 (TM1–8) and two helical hairpins (HP1 and HP2), which can be divided into transport and  
98 scaffold domains (Fig. 1c, d). The scaffold domains are located near the central symmetry axis  
99 and forms the trimer interactions, while the transport domains are located at the periphery of the  
100 trimer (Fig. 1b).

101           The transport domain consists of four TMs (TM3, TM6, TM7 and TM8), HP1 and HP2 (Fig.  
102 1c, d), which comprise HP1a, b and HP2a, b, and the connecting HP1 and HP2 loops, respectively.  
103 Two hairpins are located on the domain interface, where HP2 contacts the scaffold domain in the  
104 membrane region, while HP1 is apart from the scaffold domain and located outside of the region  
105 (Fig. 2a). The transport domains partly protrude from the lipid bilayer by about 30 Å, and the  
106 putative glutamate-binding site is open toward the intracellular solvent (Fig. 2a). Therefore, the  
107 current structure represents the inward-facing state.

108           The scaffold domain consists of four TMs (TM1, TM2, TM4 and TM5), and three of these

109 TMs are divided into segments (TM2a, b, TM4a–c and TM5a, b) (Fig. 1c, d). TM2 and TM5 are  
110 kinked by Gly82 and Pro289 (Fig. 2b) and divided into two segments, and the extracellular  
111 segments of the two helices mediate the trimeric assembly (Fig. 2b-d). In agreement with our  
112 structural information, natural variants of Gly82 and Pro289 are associated with epileptic  
113 encephalopathies<sup>40</sup>, suggesting that these mutations hinder the molecular trimerization.

114

### 115 **Putative functions of TM4 loop and lipid-binding sites**

116 All eukaryotic SLC1A transporters have a long loop between the TM4b and TM4c segments  
117 (TM4b–4c loop; Cys184–Asn241 in HsEAAT2), whereas such loops are not conserved in the  
118 archaeal homologues, Glt<sub>ph</sub> and Glt<sub>tk</sub> (Supplemental Fig. 2). In HsEAAT2, only the  
119 juxtamembrane portion of this loop forms antiparallel  $\beta$ -strands (Gln186–Lys193 and Lys231–  
120 Asp238) protruding from the scaffold domain, and the rest of the loop, including two potential  
121 glycosylation sites (Asn206 and Asn216), is completely disordered (Fig. 1a, c, d). The N206S  
122 mutation and a reduced glycosylation phenotype have been detected in neurological disorders<sup>41,42</sup>.  
123 Consistently, the N206S mutation hampers localization in the plasma membrane, hence causing  
124 a marked reduction in the EAAT2-mediated glutamate uptake<sup>43</sup>. Therefore, the  $\beta$  hairpin may  
125 structurally support the association of the flexible glycosylated loop with luminal and/or  
126 extracellular proteins during proper anterograde transports and the endocytic event which  
127 involves recycling to the plasma membrane, respectively.

128 The localizations and activities of transporters are affected by specific lipid environments,  
129 such as lipid composition and membrane thickness<sup>44</sup>. Some structural studies of SLC1A  
130 transporters reported lipid-binding sites<sup>26–28</sup>, and similarly, we observed two flat-shaped densities  
131 within each protomer. The density shapes and sizes suggested that they are likely derived from  
132 GDN and endogenous cholesterol (Supplemental Fig. 5). GDN is located between the transport

133 and scaffold domains, and the cholesterol is on the cytoplasmic end of the scaffold domain, where  
134 it forms a  $\pi$ - $\pi$  stacking interaction with Trp286 (TM5) (Supplemental Fig. 5b, c). EAAT2 tends  
135 to localize at cholesterol-rich microdomains, where cholesterol molecules are essential to sustain  
136 the transport activity<sup>45,46</sup>. Consistently, the reduction of EAAT2 activity in cholesterol-depleted  
137 membranes was reportedly observed in people with Alzheimer's disease<sup>47</sup>. Since the GDN has a  
138 cholesterol-like moiety, we hypothesize that two native cholesterol molecules could be harbored  
139 in the GDN- and cholesterol-binding sites identified in the current structure, and probably  
140 contribute to the localization and/or structural stability of EAAT2. In particular, a similar  
141 cholesterol-binding-site of ASCT2 was observed near the cholesterol-binding site of HsEAAT2  
142 (ref. <sup>27,28</sup>). Trp272 on ASCT2 TM5 (the corresponding residue of EAAT2 is Met283) also forms  
143  $\pi$ - $\pi$  stacking interactions with the cholesterol analogue. Trp286 is highly conserved among  
144 eukaryotic SLC1A transporters (Supplemental Fig. 2), and the cholesterol-binding sites of EAAT2  
145 are located near the binding site of ASCT2, suggesting that the intracellular side of TM5  
146 commonly participates in the cholesterol binding.

147

#### 148 **Substrate-free state of the transport domain**

149 In the transport domains of SLC1A transporters, amino acid-binding sites, which recognize  
150 aspartate, glutamate and neutral amino acids, are localized in between the HP1 and HP2 loops.  
151 Recent structural studies on the inward-facing and outward-facing states of ASCT2 proposed that  
152 only the HP2 loop functions as a gate for the binding sites, and this mechanism is termed the  
153 "one-gate elevator transport mechanism"<sup>28,29</sup>. After the binding site closure by the HP2 loop, an  
154 elevator-like movement allows the transport of substrates across the membrane. While six highly  
155 conserved residues (Ser364, Thr401, Asp475, Arg478, Thr479 and Asn482 in HsEAAT2)  
156 constitute the putative glutamate-binding site in HsEAAT2, and the HP2 loop adopts an open

157 conformation to allow access from the intracellular solvent, no density was observed at this site  
158 (Fig. 3a). Therefore, the current structure is likely to represent the substrate-free inward-open  
159 state. To evaluate the roles of those conserved residues, we measured the glutamate uptake  
160 activities of their point mutants, using *Xenopus* oocytes, which clearly showed that the transport  
161 activities of all mutants were essentially abolished (Fig. 3b and Supplemental Fig. 6a). These  
162 results indicate their indispensable roles in glutamate transport.

163 Amino acid transport by the SLC1A family members (EAATs, ASCTs and the archaeal  
164 homologues) is coupled with three sodium ions (Supplemental Fig. 1), and their binding sites  
165 have been clearly identified in previous structural studies<sup>19,20,23,26,30</sup>. In addition to sodium ions,  
166 EAATs utilize an extracellular H<sup>+</sup> gradient, and its coupling mechanism was clarified in a recent  
167 report on EAAT3<sup>30</sup>. Firstly, in the occluded state, the HP2 loop functions as the gate to allow the  
168 binding of the transported amino -acid to the site. Next, the HP2 loop adopts the open  
169 conformation to release the amino -acid substrate, termed “IFS-Na<sup>+</sup>” in the previous work. In this  
170 state, the coupling of H<sup>+</sup> neutralizes the charged glutamate residue (Glu405 and Glu374 in  
171 HsEAAT2 and EAAT3, respectively), whose protonation prevents the formation of a salt bridge  
172 with an arginine residue (Arg478 and Arg447 in HsEAAT2 and EAAT3, respectively) involved  
173 in the amino-acid substrate recognition. Upon the H<sup>+</sup> release, the arginine residue adopts a  
174 different conformation to form the salt bridge with the deprotonated glutamate residue.

175 In our HsEAAT2 structure, the local structures of the three residues (Met398, Glu405  
176 and Arg478) are similar to those in IFS-Na<sup>+</sup> of EAAT3 (Supplemental Fig. 7). The p*K<sub>a</sub>* value of  
177 Glu405 calculated by PROPKA program<sup>48</sup> is 7.0, which is the same pH value in our purification.  
178 Considering the structural information and the p*K<sub>a</sub>* value, Glu405 is probably in a transition  
179 between deprotonated and protonated forms, and does not stably form the salt bridge with Arg478.  
180 Therefore, our HsEAAT2 structure resembles the IFS-Na<sup>+</sup> state of EAAT3. Since the transport



181 domain adopts almost the same conformations in both the inward- and outward-facing states,  
182 behaving as a rigid body during the transport cycle<sup>20,32</sup>, a similar arrangement of the substrate-  
183 binding site could be observed in the outward-facing state of HsEAAT2.

184

### 185 **Inward-facing WAY213613-bound (IFS-WAY213613) state**

186 The transport activities of EAATs are blocked by various inhibitors. For instance, TFB-  
187 TBOA is one of the strongest inhibitors for EAATs; it significantly suppresses the activities of not  
188 only EAAT2 but also other EAATs (IC<sub>50</sub> values are 17, 22 and 300 nM for EAAT2, EAAT1 and  
189 EAAT3, respectively)<sup>49</sup>. Recently, WAY213613 was developed as a highly selective inhibitor of  
190 EAAT2 (IC<sub>50</sub> values are 85, 5004 and 3787 nM for EAAT2, EAAT1 and EAAT3, respectively, in  
191 the HEK cell line)<sup>50</sup>. Among the available inhibitors, WAY213613 is the most potent and selective  
192 for EAAT2. To clarify the underlying inhibitory mechanism, we determined the cryo-EM  
193 structure of HsEAAT2 complexed with WAY213613 (Supplemental Fig. 8). The root mean square  
194 deviation value with the substrate-free state is 0.399 Å, indicating that the structures are very  
195 similar. Consistently, the transport domains represent the inward-facing states bound with  
196 WAY213613 (IFS-WAY213613 state), and the  $F_o - F_c$  omit map calculated by Servalcat  
197 program<sup>51</sup> shows that WAY213613 is located in between HP1 and HP2 (Fig. 4a, b). WAY213613  
198 is composed of two moieties: L-asparagine (LA) and 4-(2-bromo-4,5-difluorophenoxy) phenyl  
199 (BDP) moieties (Fig. 4c). The LA moiety is recognized by four residues (Thr401, Asp475, Arg478  
200 and Thr479) at the glutamate-binding site (Fig. 4a, d), which are completely conserved among  
201 EAAT1–3 (Supplemental Fig. 2) and important for the glutamate transport (Fig. 3b). On the other  
202 hand, the BDP moiety is accommodated in a cavity located near the glutamate-binding site (Fig.  
203 4a, e), formed by the end of HP2b, TM7 and TM8.

204 While the residues located around the BDP moiety are similarly conserved in EAATs

205 (Supplemental Fig. 2 and 9), we found slight variations in three residues (Ile464, Leu467 and  
206 Val468), which are substituted with different sets of residues in EAAT1 and EAAT3  
207 (Supplemental Fig. 2). As these residues are close to the tip of the 2-bromo-4,5-difluorophenoxy  
208 group of the BDP moiety (Fig. 4c, e), we supposed that the selectivity among EAAT1–3 may  
209 depend on the BDP moiety rather than the LA moiety. To verify our hypothesis, we designed point  
210 mutants, in which these residues are substituted with the corresponding residues of EAAT1 and/or  
211 EAAT3, and investigated the inhibitory effects of WAY213613 on the mutants, using *Xenopus*  
212 oocytes. All mutants showed similar transport activities to the wild type in the absence of  
213 WAY213613 (Fig. 5a), experimentally confirming that the mutations at the cavity have no or  
214 minimal effects on the glutamate uptake. The inhibition by WAY213613 was more or less affected  
215 by all three mutants (I464V, L467I and V468I). For instance, in the L467I mutant, although the  
216 IC<sub>50</sub> value for EAAT2 is 130 nM in *Xenopus* oocytes<sup>50</sup>, the transport activity is hardly inhibited  
217 by WAY213613, showing almost the same level of glutamate uptake as the control even with the  
218 highest concentration (300 nM) of WAY213613 (Fig. 5b and Supplemental Fig. 6b). These results  
219 suggest that the cavity is closely related to the sensitivity of the EAAT subtypes to WAY213613.

220

### 221 **Inhibitory mechanism of WAY213613**

222 The LA moiety occupies the glutamate-binding site, where it probably competes with the  
223 glutamate binding, while the BDP moiety occupies the cavity near this binding site (Fig. 4d, e).  
224 A similar cavity is also present in IFS-Na<sup>+</sup> of EAAT3 (Supplemental Fig. 10a). The mutation  
225 analysis demonstrated that the inhibitory effect of WAY213613 is largely diminished when  
226 Leu467 is substituted with the corresponding residues of EAAT1 and EAAT3 (isoleucine) (Fig.  
227 5a, b and Supplemental Fig. 2). Considering the molecular superposition between the IFS-Na<sup>+</sup>  
228 state of EAAT3 and the IFS-WAY213613 state of EAAT2, the  $\gamma^2$  carbon of isoleucine would

229 narrow the cavity and sterically interfere with the binding of the 2-bromo-4,5-difluorophenoxy  
230 group of the BDP moiety (Fig. 6a). Altogether, the selectivity of WAY213613 is determined by  
231 the different local environments within the cavities among EAATs. In EAAT1 and EAAT3, slight  
232 changes would prevent the proper accommodation of the BDP moiety and thus lead to the lower  
233 affinity for WAY213613.

234 The conformation of the HP2 loop in the IFS-WAY213613 state is very similar to that in the  
235 substrate-free state. The comparison among this IFS-WAY213613 state of EAAT2 and the Asp-  
236 bound states of EAAT1 and EAAT3 revealed that the end of HP2b slightly moves towards TM7  
237 and TM8 upon aspartate binding, which accompanies the closing of the HP2 loop gate  
238 (Supplemental Fig. 10b). As the BDP moiety is likely to sterically interfere with the movements  
239 of HP2b and the HP2 loop, WAY213613 probably prevents the HP2 loop gating of EAAT2.  
240 Therefore, the LA and BDP moieties of WAY213613 play distinct roles in the EAAT2 inhibition:  
241 by competing with the glutamate binding and sterically preventing the HP2 loop gating,  
242 respectively. Closure of the HP2 loop is essential for the elevator-like movement of the transport  
243 domain<sup>29</sup>, suggesting that the BDP moiety locks the conformation of the HP2 loop to suspend the  
244 transport cycle. Whereas our structure complexed with WAY213613 represents the inward-facing  
245 state, the presence of WAY213613 in the extracellular solution clearly affected both the wild type  
246 and mutants in the oocyte assay (Fig. 5b). As the transport domains of both the inward- and  
247 outward-facing states adopt almost the same conformations and hence behave as rigid bodies  
248 during the transport cycle<sup>20</sup>, WAY213613 could bind the transport domain in the outward-facing  
249 state (Fig. 6b).

250

## 251 **Conclusion**

252 Despite the essential role of glutamate as a neural transmitter in the CNS, excessive

253 glutamate is toxic to neurons. EAAT2 clears almost all extracellular glutamate to maintain a low  
254 concentration, and dysfunction of the transporter leads to numerous neurological disorders.  
255 Therefore, extensive research has been conducted to understand the mechanism of EAAT2. In this  
256 work, we determined the structures of EAAT2 in the substrate-free and the inhibitor-bound states,  
257 and clarified the structural basis for its molecular features. Especially, the WAY213613-bound  
258 structure revealed the characteristic inhibitory mechanisms by its two moieties.

259 We observed the densities of cholesterol-related molecules in the present HsEAAT2 structure.  
260 A large portion of EAAT2 in the plasma membrane prefers to be localized at lipid rafts, reportedly  
261 affecting glutamate transport<sup>45</sup>. The detailed mechanism explaining why EAAT2 requires  
262 cholesterol molecules is still unclear. However, a recent report found that cholesterol molecules  
263 enhance the transport rate of ASCT2, showing that these molecules facilitate the elevator-like  
264 movement of the transport domains<sup>52</sup>. Since the conformational change of the transport domain  
265 induces the local membrane deformation<sup>24</sup>, the cholesterol may change the transport dynamics by  
266 altering the membrane properties<sup>53</sup>, to facilitate the uptake of extracellular glutamate. Therefore,  
267 our structural information will help to clarify the relationships between EAAT2 and lipid  
268 molecules that enhance the proper localization and activity of EAAT2. According to the inhibitory  
269 mechanism of WAY213613, more selective inhibitors for EAAT2 or other EAAT subtypes could  
270 be developed by modifying the moiety corresponding to BDP in WAY213613. Such selective  
271 inhibitors will illuminate more details of the physiological roles of EAAT2 in extracellular  
272 glutamate homeostasis, and may pave the way for future research and strategies for cancer  
273 therapies.

274

## 275 **Acknowledgements**

276 We thank all of the members of the Nureki and Kanai laboratories, R. Danev and M. Kikkawa  
277 for setting up the cryo-EM infrastructure and K. Ogomori for technical assistance. This work was  
278 supported by a grant from JSPS KAKENHI grants 16H06294 (O.N.), and by the Platform Project  
279 for Supporting Drug Discovery and Life Science Research (Basis for Supporting Innovation Drug  
280 Discovery and Life Science Research (BINDS)) from the Japan Agency for Medical Research  
281 and Development (AMED) under grant no. JP19am0101115.

282

## 283 **Contributions**

284 T. Kato purified and performed the cryo-EM trials of EAAT2, determined the structure, and  
285 planned the mutational analyses, under the supervision of T. N, Y. K. and O. N. K. K., T.  
286 Kusakizako, K. Y. and T. N. assisted with the EM image data collection, the data analyses and  
287 model building. R.O. designed mutants for transport measurements and expression analyses in *X.*  
288 *laevis*, and C. J., L. Q. and S. O. performed glutamate uptake analyses, localization analyses and  
289 western blotting, respectively, under the supervision of Y. K., T. Kato, T. Kusakizako, T. N. and  
290 O. N. wrote the manuscript, with feedback from all of the authors. Y. K. and O. N. supervised the  
291 research.

292

## 293 **Declaration of interests**

294 O.N. is a co-founder and scientific advisor for Curreio. All other authors declare no competing  
295 interests.

## 296           **Methods**

### 297                           **Purification of HsEAAT2**

298           The sequence encoding the full-length human EAAT2 isoform 1 (SLC1A2; Uniprot ID  
299           P43004) was amplified from a human brain complementary DNA library (Zyagen) and inserted  
300           into the pEG BacMam vector<sup>54</sup>, with the C-terminally fused tobacco etch virus (TEV) protease  
301           cleavage site, enhanced green fluorescent protein (eGFP) and His<sub>8</sub>-tag. Baculoviruses were  
302           generated in *Spodoptera frugiperda* Sf9 cells, using the Bac-to-Bac system (Invitrogen).

303           HEK293 GnTI<sup>-</sup> cells were grown and maintained in FreeStyle 293 medium (Gibco)  
304           supplemented with 2% fetal bovine serum, with 8% CO<sub>2</sub> under humidified conditions. P2  
305           baculovirus were added to at a density of approximate 3.0 x 10<sup>6</sup> cells/mL. Cells were cultured at  
306           37°C for 24 hours. To boost overexpression, sodium butyrate was added at a final concentration  
307           10 mM, and cells were cultured at 30°C for 48 hours. Cells were collected by centrifugation at  
308           5,000 g for 6 minutes, resuspended in Buffer A (50 mM HEPES-NaOH, pH 7.0, 300 mM NaCl  
309           and 10% glycerol) and disrupted by probe sonication for 3 minutes. The debris was removed by  
310           centrifugation (8,000g, 10 min, 4°C), and subsequently membrane was collected by  
311           ultracentrifugation (125,000g, 1 h, 4°C). Membrane pellet was resuspended in Buffer A,  
312           homogenized in a glass homogenizer and store at -80°C.

313           All purification procedures were performed at 4°C. The membrane fraction was  
314           solubilized in Buffer A containing 1.0% lauryl maltose neopentyl glycol for 1 hour. After  
315           removing the insoluble material by ultracentrifugation (125,000g, 30 min, 4°C), the supernatant  
316           was incubated with CNBr-Activated Sepharose 4 Fast Flow beads (GE Healthcare) coupled with  
317           an anti-GFP nanobody<sup>39</sup> resin for 3 hours. The resin was poured into an open column and washed  
318           with 15 column volumes of Buffer A containing 0.2% glycol diosgenin (GDN). The resin was

319 mixed with both TEV protease and Buffer A containing 2.0 mM dithiothreitol (DTT) and 0.2%  
320 GDN overnight. The resin was poured into the open column, and elution was collected and  
321 concentrated for subsequent gel filtration chromatography (Superose 6 Increase 10/300 GL, GE  
322 Healthcare) in SEC Buffer (50 mM HEPES-NaOH, pH 7.0, 300 mM NaCl, 2.0 mM DTT and  
323 0.05% GDN). The fraction containing the HsEAAT2 proteins was pooled and concentrated to 5-  
324 7 mg mL<sup>-1</sup> using an Amicon Ultra Filter (MWCO 100 kDa). In the structural analysis of the IFS-  
325 WAY213613, the HsEAAT2 proteins was incubated with 1.0 mM WAY213613 (Tocris) for 1 hour  
326 on ice.

327

### 328 **Sample vitrification and cryo-EM data acquisition**

329 The purified HsEAAT2 proteins was applied onto a freshly glow-discharged Quantifoil holey  
330 carbon grid (R1.2/1.3, Cu/Rh, 300 mesh), blotted for 4 seconds at 4 °C in 100% humidity and  
331 plunge-frozen in liquid ethane by using Vitrobot Mark IV (Thermo Fisher Scientific).

332 The grids were transferred to a Titan Krios G3i microscope (Thermo Fisher Scientific),  
333 running at 300 kV and equipped with a Gatan BioQuantum Energy Filter (GIF) and a Gatan K3  
334 direct electron detector in the electron counting mode. Imaging was obtained at a nominal  
335 magnification of 105,000×, corresponding to a calibrated pixel size of 0.83 Å/pix. Each image  
336 was dose-fractionated to 63 (substrate-free state) or 48 (IFS-WAY213613) frames at a dose rate  
337 of 15 e<sup>-</sup> per pixel per second, to accumulate a total dose of ~50 e<sup>-</sup> Å<sup>-2</sup>. The data were automatically  
338 acquired by the image shift method using the SerialEM software, with a defocus range of -0.8 to  
339 -1.6 μm.

340

## 341 **Data processing and model building**

342 Image processing was performed in RELION-3.1 (ref. <sup>55</sup>). The movie frames were aligned  
343 in  $4 \times 4$  patches and dose-weighted with RELION's implementation of the MotionCor2  
344 algorithm<sup>56</sup>, and defocus parameters were estimated by CTFFIND 4.1 (ref. <sup>57</sup>). In the apo-state,  
345 template-based auto-picking was performed with the 2D class averages of a few hundred  
346 manually picked particles as templates. A total of 1,090,865 particles were extracted in  $3.1125 \text{ \AA}$   
347  $\text{pix}^{-1}$ . These particles were subjected to one round of 2D classification. The initial 3D reference  
348 map was generated in RELION. Subsequently, 674,221 good particles were further classified in  
349 3D classification in C3 symmetry. Finally, 212,554 particles were re-extracted in the pixel size of  
350  $1.55625 \text{ \AA} \text{ pix}^{-1}$  and refined in C3 symmetry. The resulting 3D models and particle sets were  
351 subjected to per-particle defocus refinement, Bayesian polishing<sup>58</sup>, CTF refinement, and 3D  
352 refinement. The final 3D refinement and post-processing yielded map with global resolutions of  
353  $3.6 \text{ \AA}$ , with the gold standard Fourier shell correlation criteria ( $\text{FSC} = 0.143$ ). In the  
354 WAY213613-bound state, a total of 831,890 particles were extracted in  $3.1125 \text{ \AA} \text{ pix}^{-1}$ .  
355 Subsequently, similar processes were performed, and the overall gold-standard resolution was  
356  $3.49 \text{ \AA}$ . The initial structural model of HsEAAT2 was built by Phyre2 program<sup>59</sup>, based on human  
357 ASCT2 (PDB 6GCT). After model fitting by MOLREP program<sup>60</sup>, the models were manually  
358 readjusted using COOT<sup>61</sup>, and then refined using PHENIX<sup>62</sup>. The model and restrain information  
359 of WAY213613 were generated by eLBOW program<sup>63</sup>. Finally, the models and the  $F_o - F_c$  omit  
360 map of WAY213613 were refined and generated, respectively, by Refmac5 (ref. <sup>64</sup>) using  
361 Servalcat<sup>51</sup> under C3 symmetry constraints. The figures depicting the molecular structures were  
362 prepared using CueMol (<http://www.cuemol.org/>).

363



364 **Transport measurements and expression analyses in *X. laevis* oocytes**

365 EAAT2 coding sequence was amplified by PCR from pEG BacMam-HsEAAT2 with  
366 the following primer pair: forward 5'-  
367 GGGGATCCGCCACCATGGCATCTACGGAAGGTGCCAAC-3' (BamHI site underlined,  
368 Kozak sequence in italics) and reverse 5'-  
369 CCCGAATTCTCATTCTCACGTTTCCAAGGTTCTTC-3' (EcoRI site underlined). The PCR  
370 product was cloned into pcDNA3.1(+) (Invitrogen) at BamHI/EcoRI sites to obtain  
371 pcDNA3.1(+)-HsEAAT2. Mutations were introduced by whole-plasmid PCR using PrimeSTAR  
372 MAX DNA polymerase (Takara) according to the manufacturer's protocol. Amino acid  
373 substitutions to alanine (for S364A, T401A, D475A, R478A, T479A and N482A), valine (for  
374 I464V) and isoleucine (for L467I and V468I) were performed by altering the corresponding  
375 codons into GCA, GTA and ATC, respectively.

376 Transport measurements and expression analyses in *X. laevis* oocytes were performed  
377 as described previously with minor alterations<sup>65</sup>. cRNAs of EAAT2 (wild-type and mutants) were  
378 synthesized *in vitro* from EcoRI-linearized plasmids, polyadenylated, and injected into  
379 defolliculated oocytes (25 ng/oocyte). The uptake measurements were performed 3d after  
380 injection, in ND96 buffer (96 mM NaCl, 2 mM KCl, 1.8 mM CaCl<sub>2</sub>, 1 mM MgCl<sub>2</sub>, 5 mM HEPES,  
381 pH 7.4) containing 50 μM of <sup>14</sup>C-Glutamate (24.2 Ci mol<sup>-1</sup>, ARC, St. Louis, U.S.A.) for 30 min  
382 at room temperature. For inhibition experiments, the uptake of 10 μM of <sup>14</sup>C-Glutamate was  
383 measured with or without the indicated concentrations of WAY213613 (Tocris, Bio-Techne, US).  
384 Expression of EAAT2 in total membranes was analyzed by immunoblotting. Anti-EAAT2  
385 antibody (sc-365634, 1:400, Santa Cruz Biotechnology) and peroxidase goat anti-mouse IgG  
386 (AB\_10015289, 1:10,000, Jackson ImmunoResearch) were used. Localization of EAAT2 was  
387 analyzed by immunofluorescence on paraffin sections. Antigen retrieval was performed with

388 citrate buffer (0.01 M, pH6.0) at 121 °C for 5 min. Anti-EAAT2 antibody (sc-365634, 1:200,  
389 Santa Cruz Biotechnology) and Alexa Fluor 568-conjugated anti-mouse IgG (A11031, 1:2000,  
390 Invitrogen) were used. Images were acquired using a fluorescence microscope (BZ-9000,  
391 Keyence) equipped with a ×40 objective lens (CFI Plan Apo λ, numerical aperture 0.95, Nikon).

392

### 393 **Data availability**

394 The cryo-EM density maps and atomic coordinates have been deposited in the Electron  
395 Microscopy Data Bank (EMDB). The accession codes for the maps are EMD-32098 (the  
396 substrate-free state) and EMD-32097 (the IFS-WAY213613 state). The PDB accession codes for  
397 the coordinates are 7VR8 (the substrate-free state) and 7VR7 (the IFS-WAY213613 state).

398

399

400

401

## 402 **Figures**

### 403 **Main figures**

#### 404 **Figure 1 Overall structure of HsEAAT2**

405 **a, b**, Overall structure of HsEAAT2, as viewed from **(a)** the membrane plane and **(b)** the  
406 intracellular side. **c**, The scaffold domain and the transport domain in one protomer are labeled.  
407 **d**, Topology diagram of HsEAAT2. The transport domain, the scaffold domain and the β-strands  
408 of TM4 are colored light red, light blue and dark blue, respectively. Two residues (Asn206 and  
409 Asn216) in the TM4b–c are putative glycosylation sites.

410

411 **Figure 2 Protomer structure of HsEAAT2**

412 **a**, Overall structure of the HsEAAT2 protomer, as viewed from the membrane plane. The distance  
413 indicates the protrusion of the transport domain from the lipid membrane. **b**, The “kink-induced”  
414 residues Gly82 (TM2) and Pro289 (TM5). Gly82 and Pro289 are located on TM2 and TM5,  
415 respectively. **c**, Interaction of TM1, TM2, TM4 and TM5 in the same protomer. **d**, The interactions  
416 among protomers on the intracellular side. “molA–molC” in brackets show each protomer.

417

418 **Figure 3 Glutamate-binding site**

419 **a**, Comparison of the substrate-binding site in HsEAAT2 with the structure of the aspartate bound-  
420 state of EAAT1 (PDB ID 5LLU). **b**, Glutamate-uptake assay for point mutants, using *Xenopus*  
421 oocyte. Values are mean  $\pm$  s.e.m. n= 6–10 technical replicates.

422

423 **Figure 4 IFS-WAY213613 state**

424 **a, b**, Structure of the IFS-WAY213613 state. **a**, Cut-away representation of the cavity with  
425 WAY213613. **b**, Close-up views of the WAY213613-bound site. The  $F_o - F_c$  omit map of  
426 WAY213613 is contoured at  $4.0 \sigma$  (normalized within mask), shown as a light green mesh. **c**, The  
427 structure of WAY213613. WAY213613 is composed of the L-asparagine (LA) moiety and the (2-  
428 Bromo-4,5-difluorophenoxy) phenyl (BDP) moiety. **d, e**, Recognition of the LA site of  
429 WAY213613. **d**, Substrate-binding site recognizing the LA moiety of WAY213613. **e**, Close-up  
430 view of the BDP moiety of WAY213613.

431

432 **Figure 5 Sensitivity of WAY213613**

433 **a**, Glutamate-uptake of each mutant, using *Xenopus* oocytes. **b**, Glutamate-uptake assay for point  
434 mutants treated with WAY213613. Values of vertical and horizontal axes are relative to each 0  
435  $\mu\text{M}$  and concentration points (0, 0.03, 0.1 and 0,3  $\mu\text{M}$ ) of WAY213613, respectively. Values are  
436 mean  $\pm$  s.e.m. n= 6–10 technical replicates.

437

438 **Figure 6 Inhibition mechanism by WAY213613**

439 **a**, Close-up view of the IFS-WAY213613 state and molecular superposition of EAAT3 IFS- $\text{Na}^+$ .  
440 WAY213613, Leu467 (HsEAAT2) and Ile436 (EAAT3) are shown as CPK models. **b**, In the HP2-  
441 open configuration of the outward-facing state, extracellular glutamate is accessible at the  
442 substrate-binding site, and subsequently, HP2 is closed to transport glutamate into the intracellular  
443 solvent (bottom model). WAY213613 inhibits the movement of the HP2 loop (top model).

444

445 **References**

- 446 1. Bröer, S. & Palacín, M. The role of amino acid transporters in inherited and  
447 acquired diseases. *Biochem. J.* **436**, 193–211 (2011).
- 448 2. Kandasamy, P., Gyimesi, G., Kanai, Y. & Hediger, M. A. Amino acid  
449 transporters revisited: New views in health and disease. *Trends Biochem. Sci.* **43**, 752–  
450 789 (2018).
- 451 3. Freidman, N. *et al.* Amino Acid Transporters and Exchangers from the  
452 SLC1A Family: Structure, Mechanism and Roles in Physiology and Cancer. *Neurochem.*  
453 *Res.* (2020) doi:10.1007/s11064-019-02934-x.

- 454           4.     Lakhani, C. M. The challenge of understanding the brain: where we stand in  
455           2015. *Physiol. Behav.* **176**, 139–148 (2019).
- 456           5.     Nedergaard, M., Takano, T. & Hansen, A. J. Beyond the role of glutamate as  
457           a neurotransmitter. *Nat. Rev. Neurosci.* **3**, 748–755 (2002).
- 458           6.     Nakanishi, S. *et al.* Glutamate receptors: Brain function and signal  
459           transduction. *Brain Res. Rev.* **26**, 230–235 (1998).
- 460           7.     Armada-Moreira, A. *et al.* Going the Extra (Synaptic) Mile: Excitotoxicity as  
461           the Road Toward Neurodegenerative Diseases. *Front. Cell. Neurosci.* **14**, 1–27 (2020).
- 462           8.     Lehre, K. P. & Danbolt, N. C. The number of glutamate transport subtype  
463           molecules at glutamatergic synapses: Chemical and stereological quantification in young  
464           adult rat brain. *J. Neurosci.* **18**, 8751–8757 (1998).
- 465           9.     Chen, W. *et al.* The Glutamate Transporter GLT1a Is Expressed in  
466           Excitatory Axon Terminals of Mature Hippocampal Neurons. *J. Neurosci.* **24**, 1136–  
467           1148 (2004).
- 468           10.    Tanaka, K. *et al.* Epilepsy and exacerbation of brain injury in mice lacking  
469           the glutamate transporter GLT-1. *Science (80-. ).* **276**, 1699–1702 (1997).
- 470           11.    Fiorentino, A., Sharp, S. I. & McQuillin, A. Association of rare variation in  
471           the glutamate receptor gene SLC1A2 with susceptibility to bipolar disorder and  
472           schizophrenia. *Eur. J. Hum. Genet.* **23**, 1200–1206 (2015).
- 473           12.    Shan, D. *et al.* Abnormal expression of glutamate transporters in temporal  
474           lobe areas in elderly patients with schizophrenia. *Schizophr. Res.* **144**, 1–8 (2013).
- 475           13.    Hubbard, J. A., Szu, J. I., Yonan, J. M. & Binder, D. K. Regulation of  
476           astrocyte glutamate transporter-1 (GLT1) and aquaporin-4 (AQP4) expression in a  
477           model of epilepsy. *Exp. Neurol.* **283**, 85–96 (2016).

- 478           14.   Aizawa, H. *et al.* Glial glutamate transporter GLT-1 determines  
479           susceptibility to spreading depression in the mouse cerebral cortex. 1–12 (2020)  
480           doi:10.1002/glia.23874.
- 481           15.   Rothstein, J. D., Van Kammen, M., Levey, A. I., Martin, L. J. & Kuncl, R.  
482           W. Selective loss of glial glutamate transporter GLT-1 in amyotrophic lateral sclerosis.  
483           *Ann. Neurol.* **38**, 73–84 (1995).
- 484           16.   Masliah, E., Alford, M., DeTeresa, R., Mallory, M. & Hansen, L. Deficient  
485           glutamate transport is associated with neurodegeneration in Alzheimer’s disease. *Ann.*  
486           *Neurol.* **40**, 759–766 (1996).
- 487           17.   Thal, D. R. Excitatory Amino Acid Transporter EAAT-2 in Tangle-bearing  
488           Neurons in Alzheimer’s Disease. *Brain Pathol.* **12**, 405–411 (2006).
- 489           18.   Yernool, D., Boudker, O., Jin, Y. & Gouaux, E. Structure of a glutamate  
490           transporter homologue from *Pyrococcus horikoshii*. *Nature* **431**, 811–818 (2004).
- 491           19.   Boudker, O., Ryan, R. M., Yernool, D., Shimamoto, K. & Gouaux, E.  
492           Coupling substrate and ion binding to extracellular gate of a sodium-dependent aspartate  
493           transporter. *Nature* **445**, 387–393 (2007).
- 494           20.   Reyes, N., Ginter, C. & Boudker, O. Transport mechanism of a bacterial  
495           homologue of glutamate transporters. *Nature* **462**, 880–885 (2009).
- 496           21.   Jensen, S., Guskov, A., Rempel, S., Hänel, I. & Slotboom, D. J. Crystal  
497           structure of a substrate-free aspartate transporter. *Nat. Struct. Mol. Biol.* **20**, 1224–1227  
498           (2013).
- 499           22.   Akyuz, N. *et al.* Transport domain unlocking sets the uptake rate of an  
500           aspartate transporter. *Nature* **518**, 68–73 (2015).
- 501           23.   Guskov, A., Jensen, S., Faustino, I., Marrink, S. J. & Slotboom, D. J.

- 502 Coupled binding mechanism of three sodium ions and aspartate in the glutamate  
503 transporter homologue Glt Tk. *Nat. Commun.* **7**, 1–6 (2016).
- 504 24. Arkhipova, V., Guskov, A. & Slotboom, D. J. Structural ensemble of a  
505 glutamate transporter homologue in lipid nanodisc environment. *Nat. Commun.* **11**, 1–9  
506 (2020).
- 507 25. Chen, I. *et al.* Glutamate transporters have a chloride channel with two  
508 hydrophobic gates. *Nature* **591**, 327–331 (2021).
- 509 26. Canul-Tec, J. C. *et al.* Structure and allosteric inhibition of excitatory amino  
510 acid transporter 1. *Nature* **544**, 446–451 (2017).
- 511 27. Garaeva, A. A. *et al.* Cryo-EM structure of the human neutral amino acid  
512 transporter ASCT2. *Nat. Struct. Mol. Biol.* **25**, 515–521 (2018).
- 513 28. Yu, X. *et al.* Cryo-EM structures of the human glutamine transporter  
514 SLC1a5 (ASCT2) in the outward-facing conformation. *Elife* **8**, 1–17 (2019).
- 515 29. Garaeva, A. A., Guskov, A., Slotboom, D. J. & Paulino, C. A one-gate  
516 elevator mechanism for the human neutral amino acid transporter ASCT2. *Nat.*  
517 *Commun.* **10**, 1–8 (2019).
- 518 30. Qiu, B., Matthies, D., Fortea, E., Yu, Z. & Boudker, O. Cryo-EM structures  
519 of excitatory amino acid transporter 3 visualize coupled substrate , sodium , and proton  
520 binding and transport. *Sci. Adv.* **7**, 1–10 (2021).
- 521 31. Stehantsev, P. *et al.* A structural view onto disease-linked mutations in the  
522 human neutral amino acid exchanger ASCT1. *Comput. Struct. Biotechnol. J.* **19**, 5246–  
523 5254 (2021).
- 524 32. Garaeva, A. A. & Slotboom, D. J. Elevator-type mechanisms of membrane  
525 transport. *Biochem. Soc. Trans.* **48**, 1227–1241 (2020).

- 526                   33.   Kortagere, S. *et al.* Identification of Novel Allosteric Modulators of  
527                   Glutamate Transporter EAAT2. *ACS Chem. Neurosci.* **9**, 522–534 (2018).
- 528                   34.   Falcucci, R. M. *et al.* Novel Positive Allosteric Modulators of Glutamate  
529                   Transport Have Neuroprotective Properties in an in Vitro Excitotoxic Model. *ACS Chem.*  
530                   *Neurosci.* **10**, 3437–3453 (2019).
- 531                   35.   Forster, Y. M. *et al.* Elucidation of the Structure and Synthesis of  
532                   Neuroprotective Low Molecular Mass Components of the *Parawixia bistriata* Spider  
533                   Venom . *ACS Chem. Neurosci.* (2020) doi:10.1021/acchemneuro.0c00007.
- 534                   36.   Tao, J. *et al.* CD44-SLC1A2 gene fusions in gastric cancer. *Sci. Transl. Med.*  
535                   **3**, (2011).
- 536                   37.   Giacomini, C. P. *et al.* Breakpoint Analysis of Transcriptional and Genomic  
537                   Profiles Uncovers Novel Gene Fusions Spanning Multiple Human Cancer Types. *PLoS*  
538                   *Genet.* **9**, (2013).
- 539                   38.   Bacci, M. *et al.* Reprogramming of Amino Acid Transporters to Support  
540                   Aspartate and Glutamate Dependency Sustains Endocrine Resistance in Breast Cancer.  
541                   *Cell Rep.* **28**, 104-118.e8 (2019).
- 542                   39.   Kubala, M. H., Kovtun, O., Alexandrov, K. & Collins, B. M. Structural and  
543                   thermodynamic analysis of the GFP:GFP-nanobody complex. *Protein Sci.* **19**, 2389–  
544                   2401 (2010).
- 545                   40.   Guella, I. *et al.* De Novo Mutations in YWHAG Cause Early-Onset  
546                   Epilepsy. *Am. J. Hum. Genet.* **101**, 300–310 (2017).
- 547                   41.   Aoki, M. *et al.* Mutations in the glutamate transporter EAAT2 gene do not  
548                   cause abnormal EAAT2 transcripts in amyotrophic lateral sclerosis. *Ann. Neurol.* **43**,  
549                   645–653 (1998).



- 550            42.    Bauer, D., Haroutunian, V., Meador-Woodruff, J. H. & McCullumsmith, R.  
551            E. Abnormal glycosylation of EAAT1 and EAAT2 in prefrontal cortex of elderly  
552            patients with schizophrenia. *Schizophr. Res.* **117**, 92–98 (2010).
- 553            43.    Trotti, D. *et al.* Amyotrophic lateral sclerosis-linked glutamate transporter  
554            mutant has impaired glutamate clearance capacity. *J. Biol. Chem.* **276**, 576–582 (2001).
- 555            44.    Stieger, B., Steiger, J. & Locher, K. P. Membrane lipids and transporter  
556            function. *Biochim. Biophys. Acta - Mol. Basis Dis.* **1867**, 166079 (2021).
- 557            45.    Butchbach, M. E. R., Tian, G., Guo, H. & Lin, C. L. G. Association of  
558            excitatory amino acid transporters, especially EAAT2, with cholesterol-rich lipid raft  
559            microdomains: Importance for excitatory amino acid transporter localization and  
560            function. *J. Biol. Chem.* **279**, 34388–34396 (2004).
- 561            46.    Raunser, S. *et al.* Heterologously Expressed GLT-1 Associates in 200-nm  
562            Protein-Lipid Islands. **91**, 3718–3726 (2006).
- 563            47.    Tian, G., Kong, Q., Lai, L., Ray-Chaudhury, A. & Lin, C. L. G. Increased  
564            expression of cholesterol 24S-hydroxylase results in disruption of glial glutamate  
565            transporter EAAT2 association with lipid rafts: A potential role in Alzheimer’s disease.  
566            *J. Neurochem.* **113**, 978–989 (2010).
- 567            48.    Saoudi, N., Lateu, D. G., Rinaldi, J. P. & Ricard, P. Graphical analysis of  
568            pH-dependent properties of proteins predicted using PROPKA. *Bull. Acad. Natl. Med.*  
569            **192**, 1029–1041 (2011).
- 570            49.    Bozzo, L. & Chatton, J. Y. Inhibitory effects of (2S, 3S)-3-[3-[4-  
571            (trifluoromethyl)benzoylamino]benzyloxy]aspartate (TFB-TBOA) on the astrocytic  
572            sodium responses to glutamate. *Brain Res.* **1316**, 27–34 (2010).
- 573            50.    Greenfield, A. *et al.* Synthesis and biological activities of aryl-ether-, biaryl-,

- 574 and fluorene-aspartic acid and diaminopropionic acid analogs as potent inhibitors of the  
575 high-affinity glutamate transporter EAAT-2. *Bioorganic Med. Chem. Lett.* **15**, 4985–  
576 4988 (2005).
- 577 51. Yamashita, K., Palmer, C. M., Burnley, T. & Murshudov, G. N. Cryo-EM  
578 single-particle structure refinement and map calculation using Servalcat. *Acta*  
579 *Crystallogr. Sect. D Struct. Biol.* **77**, 1282–1291 (2021).
- 580 52. Scalise, M. *et al.* Interaction of Cholesterol With the Human SLC1A5  
581 (ASCT2): Insights Into Structure/Function Relationships. *Front. Mol. Biosci.* **6**, 1–13  
582 (2019).
- 583 53. Subczynski, W. K., Justyna, M. P., Mainali, L. & Raguz, M. High  
584 Cholesterol / Low Cholesterol : Effects in Biological Membranes : A Review. *Cell*  
585 *Biochem. Biophys.* 369–385 (2017) doi:10.1007/s12013-017-0792-7.
- 586 54. Goehring, A. *et al.* Screening and large-scale expression of membrane  
587 proteins in mammalian cells for structural studies. *Nat. Protoc.* **9**, 2574–2585 (2014).
- 588 55. Zivanov, J. *et al.* New tools for automated high-resolution cryo-EM structure  
589 determination in RELION-3. *Elife* **7**, 1–22 (2018).
- 590 56. Zheng, S. Q. *et al.* MotionCor2: Anisotropic correction of beam-induced  
591 motion for improved cryo-electron microscopy. *Nat. Methods* **14**, 331–332 (2017).
- 592 57. Rohou, A. & Grigorieff, N. CTFFIND4: Fast and accurate defocus  
593 estimation from electron micrographs. *J. Struct. Biol.* **192**, 216–221 (2015).
- 594 58. Zivanov, J., Nakane, T. & Scheres, S. H. W. A Bayesian approach to beam-  
595 induced motion correction in cryo-EM single-particle analysis. *IUCrJ* **6**, 5–17 (2019).
- 596 59. Lawrence A Kelley, Stefans Mezulis, Christopher M Yates, M. N. W. M. J.  
597 E. S. The Phyre2 web portal for protein modeling, prediction and analysis. *Nat. Protoc.*

- 598           **10**, 845–858 (2016).
- 599           60.   Vagin, A. & Teplyakov, A. Molecular replacement with MOLREP. *Acta*  
600           *Crystallogr. Sect. D Biol. Crystallogr.* **66**, 22–25 (2010).
- 601           61.   Emsley, P., Lohkamp, B., Scott, W. G. & Cowtan, K. Features and  
602           development of Coot. *Acta Crystallogr. Sect. D Biol. Crystallogr.* **66**, 486–501 (2010).
- 603           62.   Adams, P. D. *et al.* PHENIX: A comprehensive Python-based system for  
604           macromolecular structure solution. *Acta Crystallogr. Sect. D Biol. Crystallogr.* **66**, 213–  
605           221 (2010).
- 606           63.   Moriarty, N. W., Grosse-Kunstleve, R. W. & Adams, P. D. Electronic ligand  
607           builder and optimization workbench (eLBOW): A tool for ligand coordinate and restraint  
608           generation. *Acta Crystallogr. Sect. D Biol. Crystallogr.* **65**, 1074–1080 (2009).
- 609           64.   Kovalevskiy, O., Nicholls, R. A., Long, F., Carlon, A. & Murshudov, G. N.  
610           Overview of refinement procedures within REFMAC 5: Utilizing data from different  
611           sources. *Acta Crystallogr. Sect. D Struct. Biol.* **74**, 215–227 (2018).
- 612           65.   Lee, Y. *et al.* Cryo-EM structure of the human L-type amino acid transporter  
613           1 in complex with glycoprotein CD98hc. *Nat. Struct. Mol. Biol.* **26**, 510–517 (2019).  
614

**a**

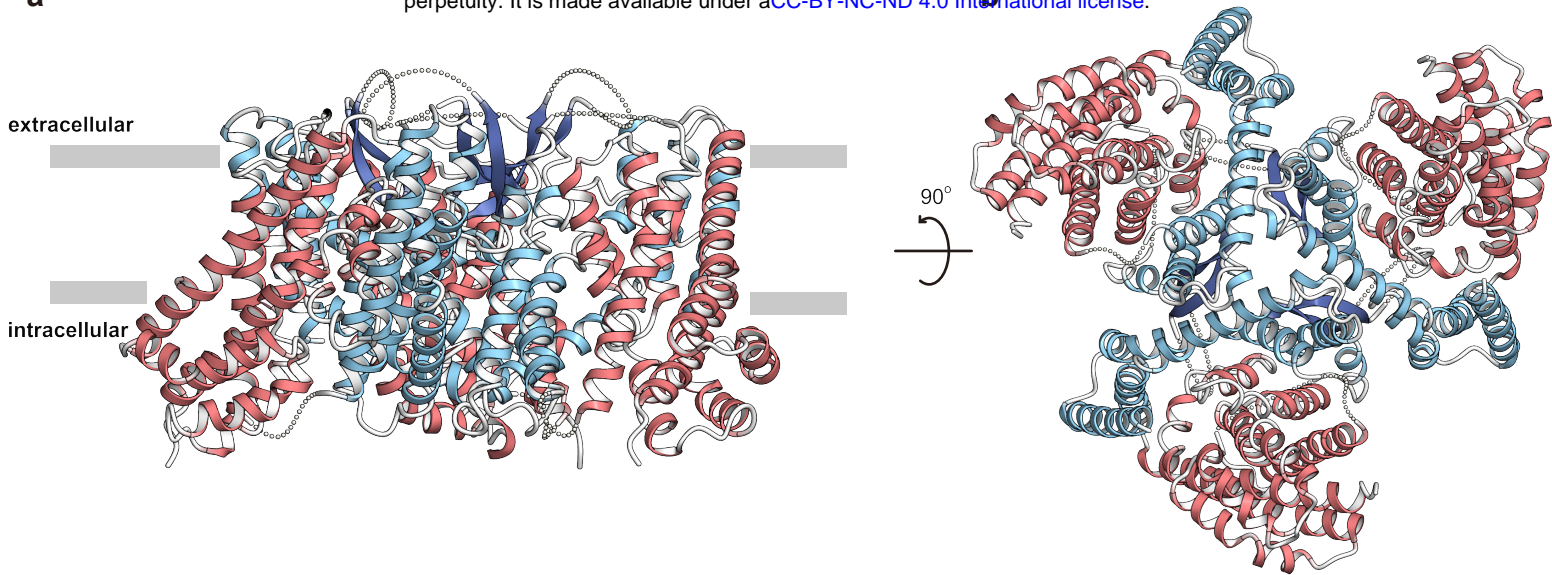

**c**

transport domain

scaffold domain

TM4b-TM4c loop

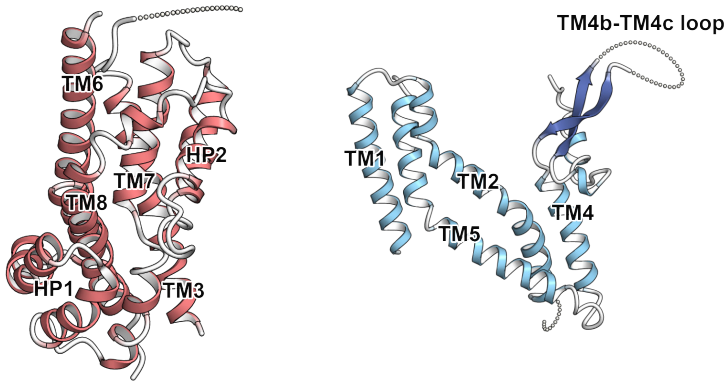

**d**

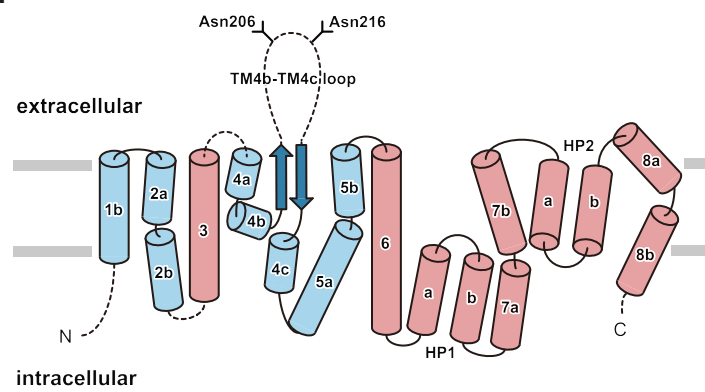

Figure 1 Kato et al., 2021

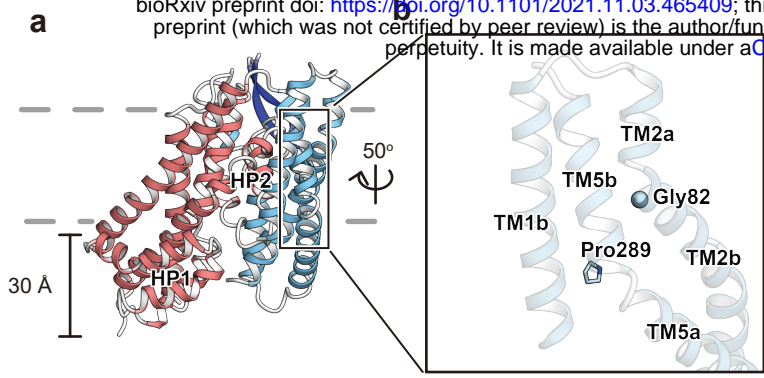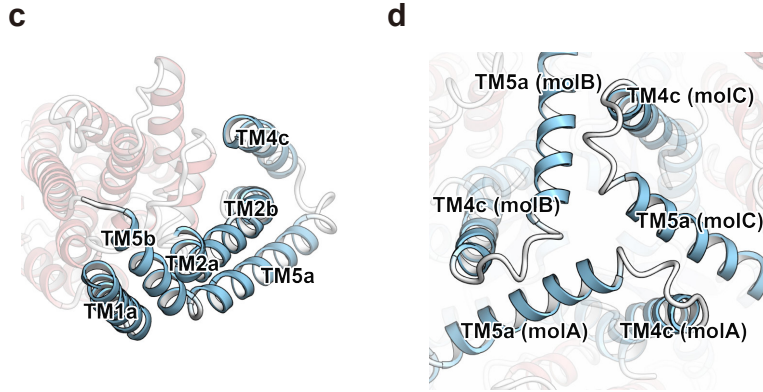

Figure 2 Kato et al., 2021

**a**

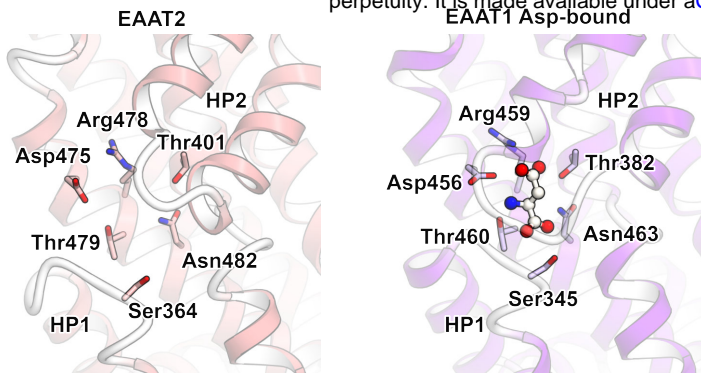

**b**

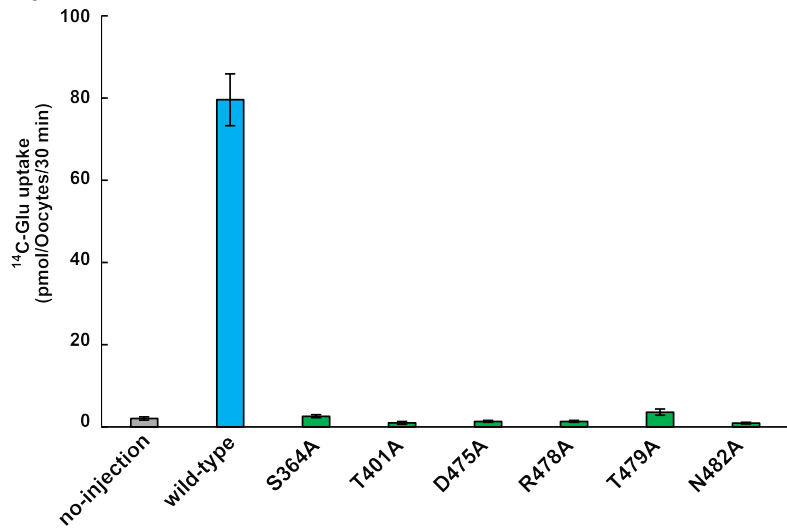

Figure 3 Kato et al., 2021

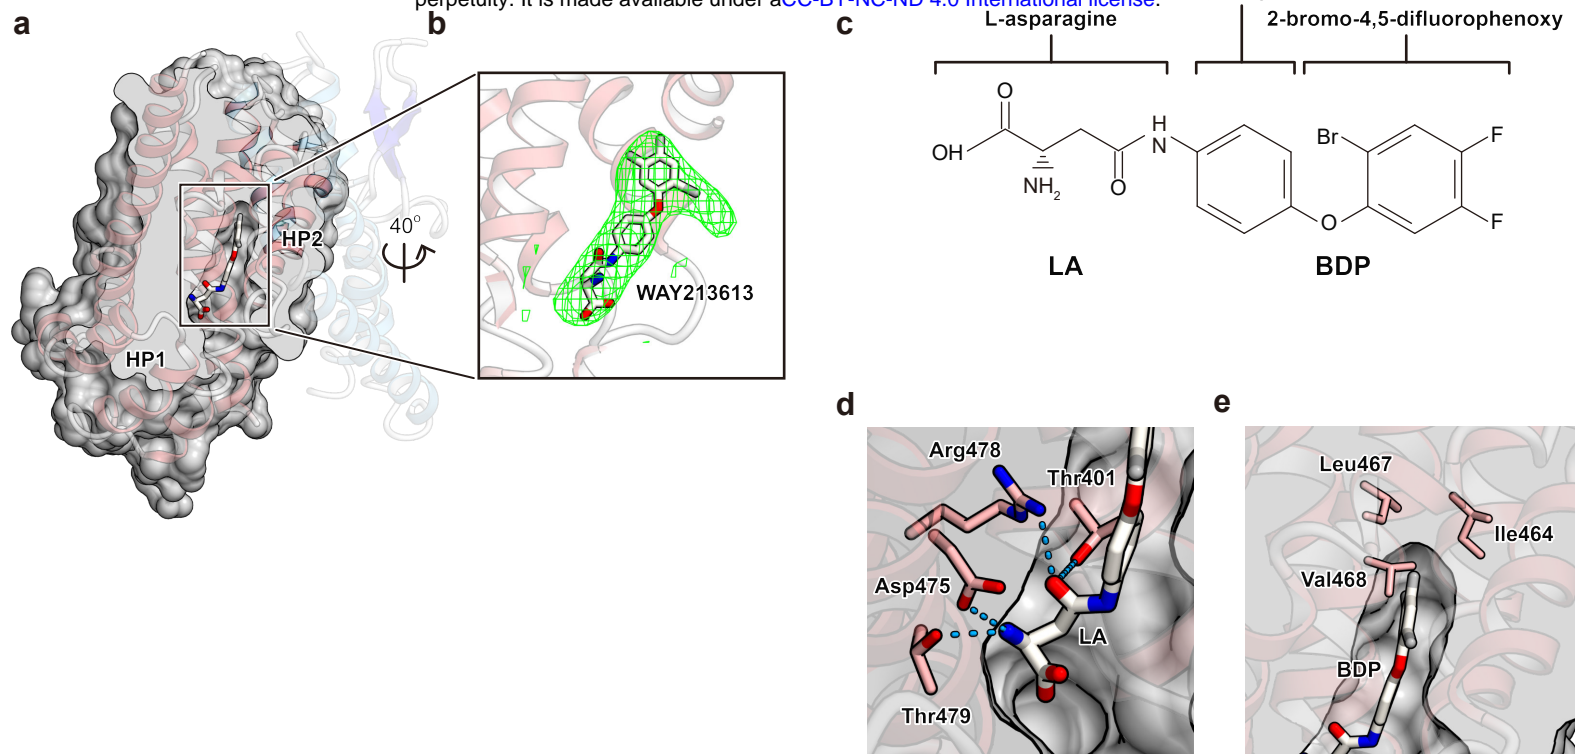

Figure 4 Kato et al., 2021

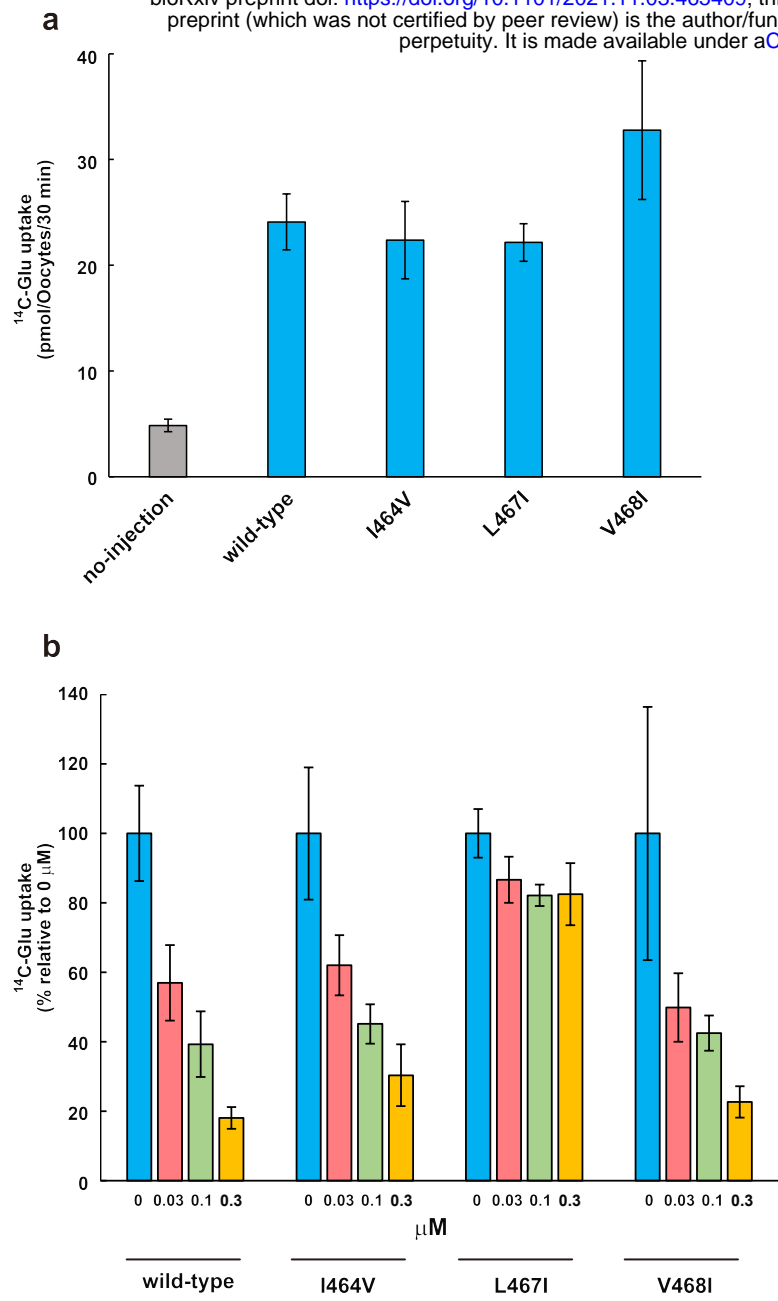

Figure 5 Kato et al., 2021



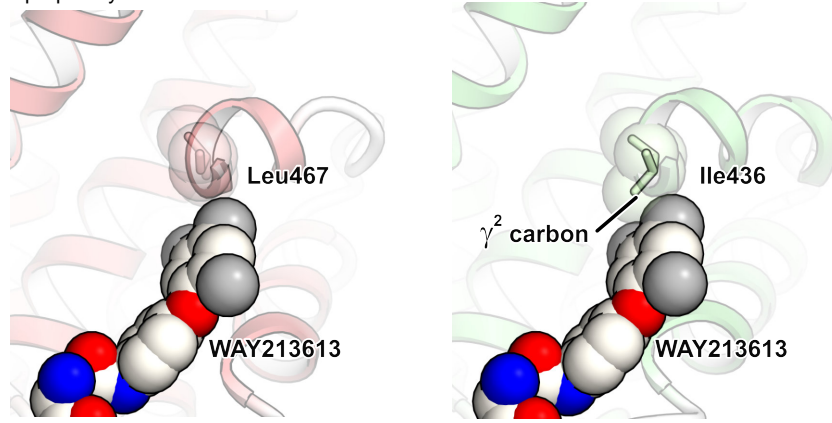

b

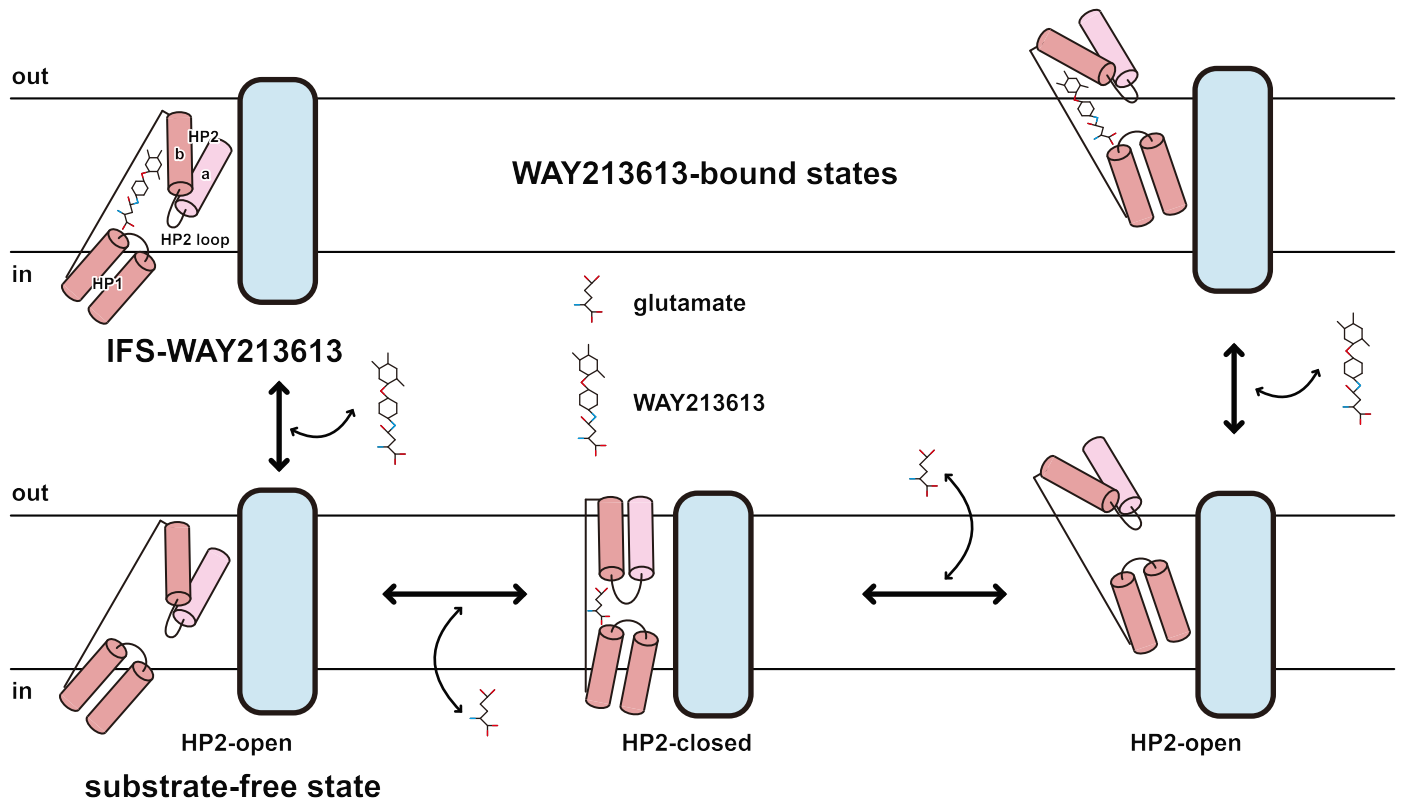

Figure 6 Kato et al., 2021

## Cryo-EM data collection, refinement and validation statistics

|                                                     | HsEAAT2 substrate-free state<br>(EMDB-32098)<br>(PDB 7VR8) | HsEAAT2 IFS-WAY213613<br>(EMDB-32097)<br>(PDB 7VR7) |
|-----------------------------------------------------|------------------------------------------------------------|-----------------------------------------------------|
| <b>Data collection and processing</b>               |                                                            |                                                     |
| Magnification                                       | × 105,000                                                  | × 105,000                                           |
| Voltage (kV)                                        | 300                                                        | 300                                                 |
| Electron exposure (e <sup>-</sup> /Å <sup>2</sup> ) | 50                                                         | 50                                                  |
| Defocus range (μm)                                  | -0.8 to -1.6                                               | -0.8 to -1.6                                        |
| Pixel size (Å)                                      | 0.83                                                       | 0.83                                                |
| Symmetry imposed                                    | C3                                                         | C3                                                  |
| Initial particle images (no.)                       | 1,090,865                                                  | 831,890                                             |
| Final particle images (no.)                         | 212,554                                                    | 527,996                                             |
| Map resolution (Å)                                  | 3.58                                                       | 3.49                                                |
| FSC threshold                                       | 0.143                                                      | 0.143                                               |
| <b>Refinement</b>                                   |                                                            |                                                     |
| Initial model used (PDB code)                       | 6GCT                                                       |                                                     |
| Model composition in the asymmetric unit            |                                                            |                                                     |
| Non-hydrogen atoms                                  | 3,012                                                      | 3,012                                               |
| Protein residues                                    | 402                                                        | 402                                                 |
| Ligands <sup>a</sup>                                | 2                                                          | 3                                                   |
| Average <i>B</i> factors (Å <sup>2</sup> )          |                                                            |                                                     |
| Protein                                             | 137.6                                                      | 129.3                                               |
| Ligand                                              | 165.3                                                      | 166.3                                               |
| R.m.s. deviations                                   |                                                            |                                                     |
| Bond lengths (Å)                                    | 0.016                                                      | 0.015                                               |
| Bond angles (°)                                     | 1.98                                                       | 1.92                                                |
| Validation                                          |                                                            |                                                     |
| MolProbity score                                    | 2.21                                                       | 1.17                                                |
| Clashscore                                          | 13.31                                                      | 3.17                                                |
| Poor rotamers (%)                                   | 2.44                                                       | 0.91                                                |
| Ramachandran plot                                   |                                                            |                                                     |
| Favored (%)                                         | 95.94                                                      | 97.72                                               |
| Allowed (%)                                         | 4.06                                                       | 2.28                                                |
| Outlier (%)                                         | 0                                                          | 0                                                   |

<sup>a</sup> Ligands include cholesterol, head moiety of GDN and WAY213613
